# Supplementary material for: Novel HER3/MUC4 oncogenic signaling aggravates the tumorigenic phenotypes of pancreatic cancer cells
Source: PubMed Central journal article supplement (PMC4673252; doi:10.18632/oncotarget.3912), 2015-05-16
Supplement: oncotarget-06-21085-s001.pdf [file oncotarget-06-21085-s001.pdf]

## SUPPLEMENTARY FIGURES

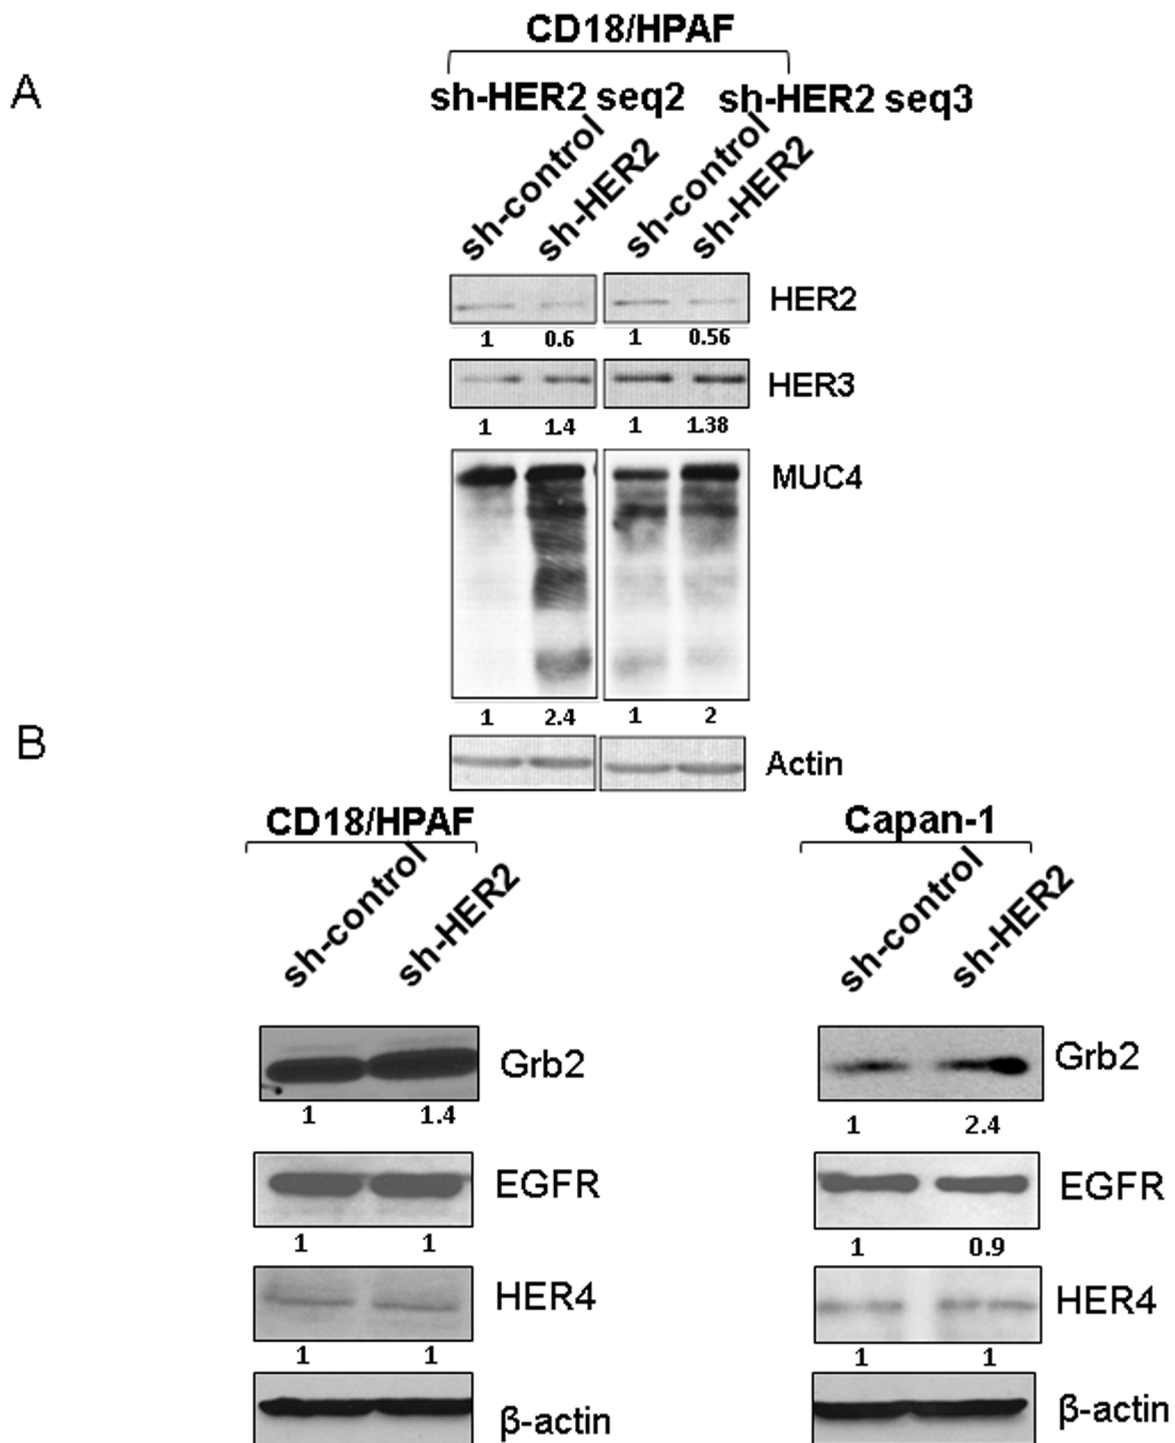

**Supplementary Figure S1: Effect of HER2 knockdown on expression of Grb2, EGFR and HER4.** A. Represents upregulation of MUC4 and HER3 in HER2 knockdown (sh-HER2 seq-2 and Seq-3) pancreatic cancer cells CD18/HPAF. B. As a result of HER2 silencing, Grb2 levels significantly increased as shown in immunoblot studies using two stable knockdown (~40%) pancreatic cancer cells (CD18/HPAF and Capan-1) when compared to scrambled control cells. There was no change in EGFR and HER4 levels in both the pancreatic cancer cells.

| Range 1: 22 to 997 <a href="#">Graphics</a> |                                                               | ▼ Next Match ▲ Previous Match |              |            |
|---------------------------------------------|---------------------------------------------------------------|-------------------------------|--------------|------------|
| Score                                       | Expect Method                                                 | Identities                    | Positives    | Gaps       |
| 900 bits(2327)                              | 0.0 Compositional matrix adjust.                              | 465/983(47%)                  | 621/983(63%) | 29/983(2%) |
| Query 25                                    | SQAVCPGTLNGLSVTGAENQYQTLTKLYKERCEVVMGNLEIVLTGHNADLSFLQWIREVT  |                               |              | 84         |
| Sbjct 22                                    | S VC GT L + E L LY+ C+VV GNLE+ NA LSFLQ I+EV                  |                               |              | 81         |
| Query 85                                    | GYVLVAMNEFSTLPLPNLRVVRGTQVYDQKFAIFVM-----LNYNTNSSHA----LRQLR  |                               |              | 135        |
| Sbjct 82                                    | GYVL+A N+ +PL LR+VRGTQ+++ +A+ V+ LN T + A LR+L+               |                               |              | 141        |
| Query 136                                   | LTQLTEILSGGVYIEKNDKLCHEMDTIDWRDIVRDRDA---EIVVKDNGRSCPPCHEVCKG |                               |              | 192        |
| Sbjct 142                                   | L LTEIL GGV I++N +LC+ DTI W+DI + ++ + R+C PC +CKG             |                               |              | 201        |
| Query 193                                   | -RCWGPGESEDCQTLTKTICAPQCNGHCFGNPNQCCHDECAGGCSGPQDTCDFACRHFND  |                               |              | 251        |
| Sbjct 202                                   | RCWG SEDCQ+LT+T+CA C C GP P CCH++CA GC+GP+ +DC AC HFN         |                               |              | 260        |
| Query 252                                   | SGACVPRCPQPLVYNKLTQLEPNPHTKYQYGGVCVASCPHNFV-VDQTSVVRACPPDKM   |                               |              | 310        |
| Sbjct 261                                   | SG C CP + YN TF+ PNP +Y +G CV +CP+N++ D SC CP                 |                               |              | 320        |
| Query 311                                   | EVD-KNGLKMCPECGGLCPKACEGTGSG--SRFQTVDSNIDGFVNCTKILGNLDFLITG   |                               |              | 367        |
| Sbjct 321                                   | EV ++G + CE C C + C G G + V S+NI F C KI G+L FL                |                               |              | 380        |
| Query 368                                   | LNGDPWHKIPALDPEKLVNVRTVREITGYLNIQSWPPHMHNFVSNLTTIGGRSLYNRG    |                               |              | 427        |
| Sbjct 381                                   | +GDP L PE+L VF T+ EITGYL I +WP + + SVF NL I GR L+N            |                               |              | 440        |
| Query 428                                   | FSLIMKLNVTSLGFRSLKEISAGRIYISANRQLCYHHSLNWTKVLRGPTERLDIKHN     |                               |              | 487        |
| Sbjct 441                                   | +SL ++ L ++ LG RSL+E+ +G I N LC+ H++ W ++ R P + L N           |                               |              | 498        |
| Query 488                                   | RPRRDCVAEGKVCPLCSSGGCWGPGQCLSCRNYSRGGVCVTHCNFLNGEPREFAHEA     |                               |              | 547        |
| Sbjct 499                                   | RP +CV EG C LC+ G CWGPGP QC++C + RG CV C L G PRE+ +           |                               |              | 558        |
| Query 548                                   | ECFSCHPECQPMEGTATCNGSGSDTCAQCAHFRDGPVSSCPHGVLG--AKGPIYKYPD    |                               |              | 605        |
| Sbjct 559                                   | C CHPECQ G+ TC G +D C CAH++D P CV+ CP GV + PI+K+PD            |                               |              | 618        |
| Query 606                                   | VQNECRPCHENCTQGCKGPELQDCLGQTLVLIGKTHLTMALTVIAGLVVIFMMLGGTFLY  |                               |              | 665        |
| Sbjct 619                                   | + C+PC NCT C + + C + + LT ++ + G++++ ++ +                     |                               |              | 674        |
| Query 666                                   | WRGRRIQ-NKRAMRRYLERGESIEPLDPS-EKANKVLARIFKETELRKLKVLGSGVFGTV  |                               |              | 723        |
| Sbjct 675                                   | + R+ + K MRR L+ E +EPL PS N+ RI KETELRK+KVLGSG FGTV           |                               |              | 734        |
| Query 724                                   | IKRRQKIRKTYMRRLLQETELVEPLTPSGAMPNQAQMRILKETELRKKVVLGSGAFGTV   |                               |              | 734        |
| Query 724                                   | HKGWVWIPGESIKIPVCIKVEDKSGRQSFQAVTDHMLAIGSLDHAHIVRLLGLCPGSSL   |                               |              | 783        |
| Sbjct 735                                   | +KG+WIP+GE++KIPV IKV+ + + ++ + + D + + ++ RLLG+C S++          |                               |              | 794        |
| Query 784                                   | YKGIWIPDGENVKIPVAIKVLENTSPKANKEILDEAYVMAGVGSPIVSRLLGICLTSTV   |                               |              | 794        |
| Query 784                                   | QLVTOYLPGLSLLDHVRQHRGALGPQLLNWGVQIAKGMYYLEEHGMVHRNLAARNVLLK   |                               |              | 843        |
| Sbjct 795                                   | QLVTQ +P G LLDHVR++RG LG Q LLNW +QIAKGM YLE+ +VHR+LAARNVL+K   |                               |              | 854        |
| Query 844                                   | QLVTQLMPYGCLLDHVRENRRGLGSQDLLNWCMIKAGMSYLEDVRLVHRDLAARNVLVK   |                               |              | 854        |
| Query 844                                   | SPSQVQVADFGVADLLPDDKQLLYSEAKTPIKWMALSIHFGKYTHQSDVWSYGVTWVE    |                               |              | 903        |
| Sbjct 855                                   | SP+ V++ DFG+A LL D+ + K PIKWMALSI ++THQSDVWSYGVTWVE           |                               |              | 914        |
| Query 904                                   | SPNHVKITDFGLARLLDIDETEHADGKVPKWMALSIILRRRFTHQSDVWSYGVTWVE     |                               |              | 914        |
| Query 904                                   | LMTFGAEPYAGRLAEVDPDLEKGERLAQPQICTIDVYVMVKCWMIDENIRPTFKELAN    |                               |              | 963        |
| Sbjct 915                                   | LMTFGA+PY G+ E+PDLEKGERL QP ICTIDVYM+MVKCWMID RP F+EL +       |                               |              | 974        |
| Query 964                                   | LMTFGAKPYDGPAREIPDLEKGERLPQPPICTIDVYIMVKCWMIDSECRPRFRELVS     |                               |              | 974        |
| Query 964                                   | EFTRMARDPPRYLVIKRES-GPG 985                                   |                               |              |            |
| Sbjct 975                                   | EF+RMARDP R++VI+ E GP 997                                     |                               |              |            |

## HER2

### Sequence search results

[Show](#) the detailed description of this results page.

We found **6** Pfam-A matches to your search sequence (**5** significant and **1** insignificant). You did not choose to search for Pfam-B matches.

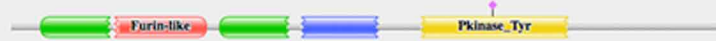

[Show](#) the search options and sequence that you submitted.

[Return](#) to the search form to look for Pfam domains on a new sequence.

## HER3

### Sequence search results

[Show](#) the detailed description of this results page.

We found **5** Pfam-A matches to your search sequence (**all** significant). You did not choose to search for Pfam-B matches.

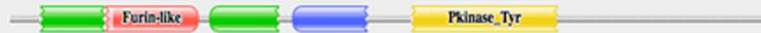

[Show](#) the search options and sequence that you submitted.

[Return](#) to the search form to look for Pfam domains on a new sequence.

### Significant Pfam-A Matches

[Show](#) or [hide](#) all alignments.

| Family                         | Description                      | Entry type | Clan                   | Envelope |     | Alignment |     | HMM       |            | HMM length | Bit score | E-value | Predicted active sites | Show/hide alignment  |
|--------------------------------|----------------------------------|------------|------------------------|----------|-----|-----------|-----|-----------|------------|------------|-----------|---------|------------------------|----------------------|
|                                |                                  |            |                        | Start    | End | Start     | End | From      | To         |            |           |         |                        |                      |
| <a href="#">Recep_L_domain</a> | Receptor L domain                | Domain     | n/a                    | 55       | 167 | 56        | 166 | <b>2</b>  | <b>111</b> | 112        | 104.3     | 3.4e-30 | n/a                    | <a href="#">Show</a> |
| <a href="#">Furin-like</a>     | Furin-like cysteine rich region  | Domain     | <a href="#">CL0547</a> | 169      | 332 | 182       | 332 | <b>11</b> | 149        | 149        | 108.0     | 3e-31   | n/a                    | <a href="#">Show</a> |
| <a href="#">Recep_L_domain</a> | Receptor L domain                | Domain     | n/a                    | 353      | 474 | 353       | 472 | 1         | <b>110</b> | 112        | 102.4     | 1.3e-29 | n/a                    | <a href="#">Show</a> |
| <a href="#">GF_recep_IV</a>    | Growth factor receptor domain IV | Domain     | <a href="#">CL0547</a> | 499      | 630 | 499       | 629 | 1         | <b>131</b> | 132        | 162.4     | 3.7e-48 | n/a                    | <a href="#">Show</a> |
| <a href="#">Pkinase_Tyr</a>    | Protein tyrosine kinase          | Domain     | <a href="#">CL0016</a> | 709      | 965 | 710       | 964 | <b>2</b>  | <b>258</b> | 259        | 259.4     | 2.5e-77 | n/a                    | <a href="#">Show</a> |

**Supplementary Figure S2A and S2B: Bioinformatic prediction of MUC4 and HER3 interaction.** **S2A.** Sequence alignment between Her2 and Her3 shows 47% identity and 63% positives suggesting a close relationship between these two sequences. **S2B.** Domain structure analysis of Her2 and Her3 also reveals almost identical structure indicating functional similarity between these two proteins.

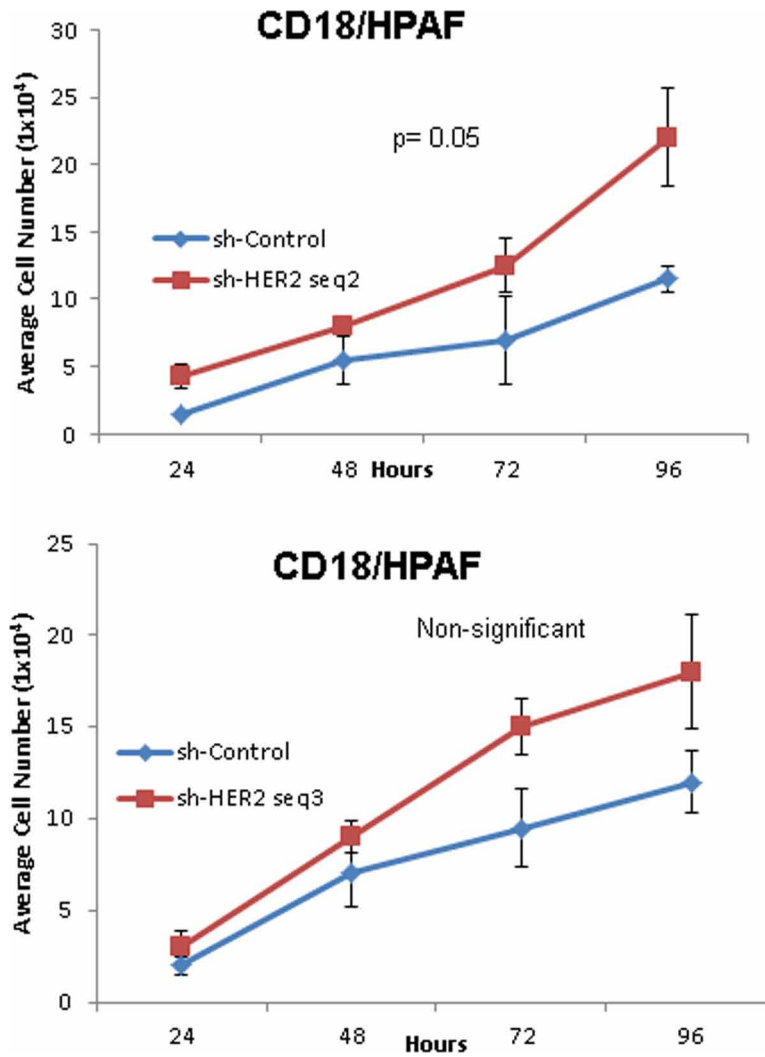

**Supplementary Figure S3A and S3B: Effect of HER2 knockdown (two other shHER2) on growth rate of pancreatic cancer cells.** In order to validate the HER2 knockdown studies, we utilized the other two shHER2 sequence for growth kinetic assay. As a result of HER2 knockdown we also observed increased proliferation in HER2 knockdown cells in comparison to scramble control cells.

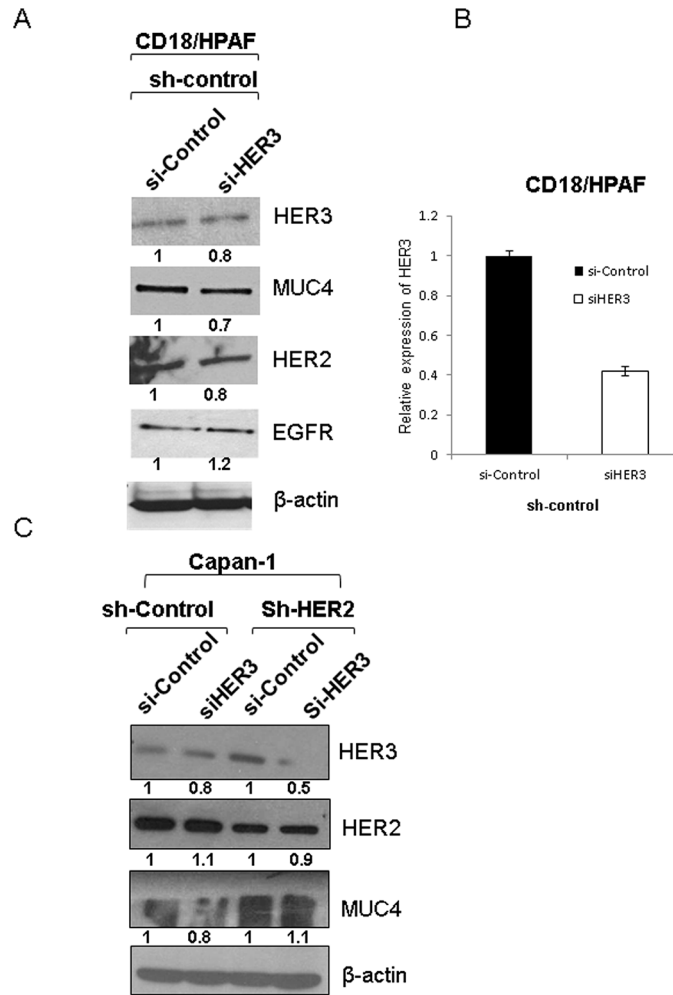

**Supplementary Figure S4: Transient knockdown of HER3 in Capan-1 cells.** The results show that the effect of HER3 knockdown on HER2 and MUC4 expression.
